## 16 **Abstract**

17           The enzyme methyl-coenzyme M reductase (MCR), found in strictly anaerobic  
18 methanogenic and methanotrophic archaea, catalyzes a reversible reaction involved in the  
19 production and consumption of the potent greenhouse gas methane. The  $\alpha$  subunit of this  
20 enzyme (McrA) contains several unusual post-translational modifications, including an  
21 exceptionally rare thioamidation of glycine. Based on the presumed function of homologous  
22 genes involved in the biosynthesis of thioamide-containing natural products, we hypothesized  
23 that the archaeal *tfuA* and *ycaO* genes would be responsible for post-translational installation of  
24 thioglycine into McrA. Mass spectrometric characterization of McrA in a  $\Delta ycaO$ -*tfuA* mutant of  
25 the methanogenic archaeon *Methanosarcina acetivorans* revealed the presence of glycine, rather  
26 than thioglycine, supporting this hypothesis. Physiological characterization of this mutant  
27 suggested a new role for the thioglycine modification in enhancing protein stability, as opposed  
28 to playing a direct catalytic role. The universal conservation of this modification suggests that  
29 MCR arose in a thermophilic ancestor.

## 30 **Introduction**

31 Methyl-coenzyme M reductase (MCR) is a unique enzyme found exclusively in  
32 anaerobic archaea, where it catalyzes the reversible conversion of methyl-coenzyme M (CoM, 2-  
33 methylmercaptoethanesulfonate) and coenzyme B (CoB, 7-thioheptanoylthreoninephosphate) to  
34 methane and a CoB-CoM heterodisulfide (1, 2):

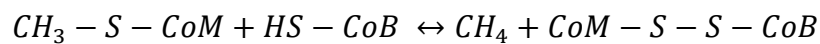

35 This enzymatic reaction, which is believed to proceed via an unprecedented methyl radical  
36 intermediate (3), plays a critical role in the global carbon cycle (4). Thus, in the forward  
37 direction MCR catalyzes the formation of methane in methane-producing archaea  
38 (methanogens), whereas the enzyme initiates methane consumption in methanotrophic archaea  
39 (known as ANMEs for anaerobic oxidation of methane) in the reverse direction. Together, these  
40 processes produce and consume gigatons of methane each year, helping to establish the steady-  
41 state atmospheric levels of an important greenhouse gas. MCR displays an  $\alpha_2\beta_2\gamma_2$  protein domain  
42 architecture and contains two molecules of a nickel-containing porphinoid cofactor,  $F_{430}$  (1, 5, 6).  
43 The reduced Ni(I) form of  $F_{430}$  is essential for catalysis (7), but is highly sensitive to oxidative  
44 inactivation, a feature that renders biochemical characterization of MCR especially challenging.  
45 As a result, many attributes of this important enzyme remain uncharacterized.

46           One of the most unusual features of MCR is the presence of several modified amino acids  
47    within the active site of the  $\alpha$ -subunit. Among these are a group of methylated amino acids,  
48    including 3-methylhistidine (or  $N^1$ -methylhistidine),  $S$ -methylcysteine, 5(S)-methylarginine, and  
49    2(S)-methylglutamine, which are likely installed post-translationally by  $S$ -adenosylmethionine-  
50    dependent methyltransferases (8, 9). 3-methylhistidine is found in all MCRs examined to date,  
51    whereas the presence of the other methylated amino acids is variable among methane-  
52    metabolizing archaea (9). A didehydroaspartate modification is also observed in some, but not  
53    all, methanogens (10). Lastly, a highly unusual thioglycine modification, in which the peptide  
54    amide bond is converted to a thioamide, is present in all methanogens that have been analyzed to  
55    date (1, 9).

56           The function(s) of the modified amino acids in MCR has/have not yet been  
57    experimentally addressed; however, several theories have been postulated. The 3-methylhistidine  
58    may serve to position the imidazole ring that coordinates CoB. This methylation also alters the  
59     $pK_a$  of histidine in a manner that would promote tighter CoB-binding (11). The variable  
60    occurrence of the other methylated amino acids suggests that they are unlikely to be directly  
61    involved in catalysis. Rather, it has been hypothesized that they tune enzyme activity by altering  
62    the hydrophobicity and flexibility of the active site pocket (9, 11). A similar argument has been  
63    made for the didehydroaspartate residue (10). In contrast, two distinct mechanistic hypotheses



64 implicate the thioglycine residue in catalysis. The first proposes that thioglycine facilitates  
65 deprotonation of CoB by reducing the  $pK_a$  of the sulfhydryl group (12); the second suggests that  
66 thioglycine could serve as an intermediate electron carrier for oxidation of a proposed  
67 heterodisulfide anion radical intermediate (13).

68 Thioamides are rare in biology. While cycasthioamide is plant-derived (14), most other  
69 naturally occurring thioamides are of prokaryotic origin. Among these are the ribosomally  
70 synthesized and post-translationally modified (RiPP) peptide natural products thioviridamide  
71 (15) and methanobactin (16–18), as well closthioamide, which appears to be an unusual non-  
72 ribosomal peptide (19, 20). The nucleotide derivatives thiouridine and thioguanine (21), and two  
73 additional natural product antibiotics, thiopeptin and Sch 18640 (22, 23), also contain thioamide  
74 moieties. Although the mechanism of thioamide installation has yet to be established, the recent  
75 identification of the thioviridamide biosynthetic gene cluster provides clues to their origin (24).  
76 Two of the proteins encoded by this gene cluster have plausible roles in thioamide synthesis. The  
77 first, TvaH, is a member of the YcaO superfamily, while the second, TvaI, is annotated as a  
78 “TfuA-like” protein (24). Biochemical analyses of YcaO-family proteins indicate that they  
79 catalyze the ATP-dependent cyclodehydration of cysteine, serine, and threonine residues to the  
80 corresponding thiazoline, oxazoline, and methyloxazoline (Fig. 1). Many azoline heterocycles  
81 undergo dehydrogenation to the corresponding azole, which are prominent moieties in various

82 RiPP natural products classes, such as linear azol(in)e-containing peptides, thiopeptides, and  
83 cyanobactins (25–28). The YcaO-dependent synthesis of peptidic azol(in)e heterocycles often  
84 requires a partner protein, which typically is the neighboring gene in the biosynthetic cluster  
85 (29–31). Based on enzymatic similarity, the TfuA protein encoded adjacent to the YcaO in the  
86 thioviridamide pathway may also enhance the thioamidation reaction, perhaps by recruiting a  
87 sulfurtransferase protein, as reported in the biosynthesis of thiouridine and thioguanine (32, 33).

88         The biosynthesis of the thioglycine in MCR was proposed to occur by a mechanism  
89 similar to that used to produce thioamide-containing natural products (9), a prediction made six  
90 years prior to the discovery of the thioviridamide biosynthetic gene cluster (24). Given their  
91 putative role in thioamidation reactions, it is notable that YcaO homologs were found to be  
92 universally present in an early analysis of methanogen genomes, resulting in their designation as  
93 “methanogenesis marker protein 1” (34). Genes encoding TfuA homologs are also ubiquitous in  
94 methanogens, usually encoded in the same locus as *ycaO*, similar to their arrangement in the  
95 thioviridamide gene cluster. Therefore, both biochemical and bioinformatic evidence are  
96 consistent with these genes being involved in thioglycine biosynthesis. In this report, we use the  
97 genetically tractable methanogen *Methanosarcina acetivorans* to show that installation of the  
98 thioamide bond at Gly465 in the  $\alpha$ -subunit of MCR requires the *ycaO-tfuA* locus. Significantly,  
99 the viability of *ycaO-tfuA* mutants precludes the hypothesis that the thioamide residue is

100 catalytically critical. Instead, our phenotypic analyses support a pivotal role for thioglycine in  
101 MCR protein stability.

## 102 **Results**

103 **Phylogenetic analyses of TfuA and YcaO in methanogenic and methanotrophic**  
104 **archaea.** To examine the possibility that YcaO and TfuA are involved in McrA thioamidation,  
105 we reassessed the distribution, diversity, and phylogeny of genes encoding these proteins in  
106 sequenced microbial genomes, which today comprise a much larger dataset than when  
107 “methanogenesis marker protein 1” was first proposed (34). Significantly, all complete  
108 methanogen and ANME genome sequences encode a YcaO homolog, with a few strains  
109 encoding two copies (Fig. 2). The YcaO sequences form a distinct, well-supported clade that also  
110 includes homologs from ammonia-oxidizing archaea (Fig.2 – Supplemental Figure 1). Excluding  
111 the second YcaO in strains that encode two copies, the YcaO tree is congruent with the  
112 phylogeny of methanogens reconstructed using housekeeping or *mcr* genes (Fig. 2). Thus, it is  
113 likely that YcaO was acquired early in the evolution of methanogens and maintained largely  
114 through vertical inheritance, as expected for a trait that coevolved with MCR (35, 36) .

115 TfuA homologs are encoded in the overwhelming majority of MCR-encoding taxa,  
116 although a few species lack this gene. The latter include *Methanopyrus kandleri* and  
117 *Methanocaldococcus janaschii*, two species previously shown to contain the thioglycine

118 modification (9) (Fig. 2). Thus, TfuA cannot be obligatorily required for thioglycine installation.  
119 The archaeal TfuA proteins also fall within a single clade that is largely congruent with the  
120 evolutionary history of archaea (Fig.2 – Supplemental Figure 1 and Supplemental Figure 2);  
121 however, unlike YcaO, the methanogen clade includes numerous bacterial homologs (Fig.2 –  
122 Supplemental Figure 2).

123 The genomic context of *tfuA* and *ycaO* in methanogens supports a shared or related  
124 function, perhaps involving sulfur incorporation and/or methanogenesis (Fig. 2). When both are  
125 present, the two genes comprise a single locus in which the stop codon of the upstream *ycaO*  
126 gene overlaps with the start codon of the downstream *tfuA* gene, suggesting that they are co-  
127 transcribed. In several instances, additional genes involved in sulfur metabolism such as *thiF*,  
128 *sufS*, as well as *moaD*, *moaE* and *moeB* (involved in molybdopterin biosynthesis) (37, 38) are  
129 found in the genomic vicinity. Occasionally, genes encoding enzymes involved in  
130 methanogenesis, including the *Methanomassiliicoccus* MCR operon, are found in the  
131 neighborhood (Fig. 2).

132 **TfuA and YcaO are not essential in *Methanosarcina acetivorans*.** To test their role in  
133 thioglycine installation, we generated a mutant lacking the *ycaO-tfuA* locus in the genetically  
134 tractable methanogen *Methanosarcina acetivorans*. Based on the hypothesis that thioglycine may  
135 be imperative for MCR activity, and the knowledge that the MCR-encoding operon

136 (*mcrBCDAG*) is essential (39), we first examined the viability of  $\Delta ycaO$ -*tfuA* mutants using a  
137 recently developed Cas9-based assay for gene essentiality (40). This assay compares the number  
138 of transformants obtained using a Cas9 gene-editing plasmid with and without a repair template  
139 that creates a gene deletion. Essential genes give similar, low numbers of transformants with or  
140 without the repair template; whereas non-essential genes give *ca.*  $10^3$ -fold higher numbers with  
141 the repair template. Our data strongly suggest that deletion of the *ycaO*-*tfuA* locus has no impact  
142 on viability (Fig. 3). Several independent mutants were clonally purified and verified by PCR  
143 prior to phenotypic characterization (Figure 3 – Supplemental Figure 1).

144 **The  $\Delta ycaO$ -*tfuA* mutant lacks the McrA Gly465 thioamide.** To test whether YcaO and  
145 TfuA are involved in the post-translational modification of Gly465 in McrA, we isolated the  
146 McrA protein from cell extracts of the  $\Delta ycaO$ -*tfuA* mutant and its isogenic parent by excising the  
147 appropriate bands from Coomassie-stained SDS-PAGE gels. These proteins were then subjected  
148 to in-gel trypsin digestion and the resulting peptides analyzed by matrix-assisted laser  
149 desorption-ionization time-of-flight mass spectrometry (MALDI-TOF-MS). The mass spectrum  
150 of the parental strain showed a peak at  $m/z$  3432 Da (Fig. 4) corresponding to the peptide  
151 (<sub>461</sub>LGFFGGFDLQDQCGATNVLSYQGDEGLPDEL<sub>491</sub>) with Gly465 being thioamidated (9,  
152 11). The identity of this peptide was confirmed by high-resolution electrospray ionization  
153 tandem MS analysis (HR-ESI-MS/MS,  $[M+3H]^{3+}$  expt.  $m/z$  1144.8608 Da; calc.  $m/z$  1144.8546

154 Da; 5.4 ppm error; Fig. 4 – Supplemental Figure 1A). This peptide also contains the recently  
155 reported didehydroaspartate modification at Asp470 (10) and *S*-methylation at Cys472 (8).  
156 Consistent with the involvement of TfuA-associated YcaO proteins in thioamide formation, we  
157 noted the absence of the *m/z* 3432 Da species in the mass spectrum of a similarly treated  $\Delta ycaO$ -  
158 *tfuA* sample. Instead, a predominant *m/z* 3416 Da species appeared, which was 16 Da lighter,  
159 consistent with replacement of sulfur by oxygen. HR-ESI-MS/MS analysis again confirmed the  
160 identity of this peptide as being McrA L461-R491 ( $[M+3H]^{3+}$  expt. *m/z* 1139.5316 Da; calc. *m/z*  
161 1139.5290 Da; 2.3 ppm error; Fig. 4 – Supplemental Figure 1B). In contrast to the thioglycine-  
162 containing wild-type peptide, we observed fragmentation between Gly465 and Phe466 ( $b_5$  ion,  
163 Fig. 4 – Supplemental Figure 1B) in the  $\Delta ycaO$ -*tfuA* strain. The lack of fragmentation in the  
164 wild-type peptide was anticipated based on the greater double bond character of C-N bonds in  
165 thioamides (41). The *m/z* 3375 Da species present in both samples corresponds to an unrelated  
166 tryptic peptide, McrA Asp392-Arg421 (Fig. 4 – Supplemental Figure 2). We also observed a  
167 peak at *m/z* 1496 in both the parent and mutant samples corresponding to a *N*-methylhistidine-  
168 containing tryptic peptide (His271-Arg284, Fig. 4 – Supplemental Figure 3A). Thus, thioglycine  
169 formation is not a prerequisite for this modification. Additionally, a peak observed *m/z* 1561,  
170 corresponding to McrA Phe408-Arg421, shows that Gln420 remains unmodified in *M.*

171 *acetivorans*, as has previously been observed for *Methanosarcina barkeri* (Fig. 4 – Supplemental  
172 Figure 3B) (9).

173 **Growth defects associated with loss of the McrA thioglycine modification.** To  
174 understand potential phenotypic consequences of losing the thioglycine modification, we  
175 quantified the doubling time and growth yield by monitoring changes in optical density during  
176 growth of *M. acetivorans* on a variety of substrates (Table 1). While no significant differences  
177 were observed during growth on methanol or trimethylamine hydrochloride (TMA) at 36 °C, the  
178  $\Delta ycaO\text{-}tfuA$  mutant had substantially longer generation times and lower cell yields on both  
179 dimethylsulfide (DMS) and acetate (Table 1). Interestingly, the growth phenotype on methanol  
180 medium was strongly temperature-dependent, with no observed differences at 29 and 36 °C, but  
181 severe defects for the  $\Delta ycaO\text{-}tfuA$  mutant at 39 and 42 °C. Unlike the parental strain, the mutant  
182 was incapable of growth at 45 °C (Fig. 5).

183

## 184 **Discussion**

185 The loss of the thioglycine modification in the  $\Delta ycaO\text{-}tfuA$  mutant suggests that these genes  
186 are directly involved in the post-translational modification of McrA. Mechanistically, this  
187 conclusion is compatible with biochemical analyses of YcaO homologs. YcaO enzymes that  
188 carry out the ATP-dependent cyclodehydration of beta-nucleophile-containing amino acids have

189 been extensively investigated (28). Such cyclodehydratases coordinate the nucleophilic attack of  
190 the cysteine, serine, and threonine side chain on the preceding amide carbonyl carbon in a  
191 fashion reminiscent of intein splicing (42) (Fig. 1). The enzyme then *O*-phosphorylates the  
192 resulting oxyanion and subsequently *N*-deprotonates the hemioorthoamide, yielding an azoline  
193 heterocycle. An analogous reaction can be drawn for the YcaO-dependent formation of peptidic  
194 thioamides. The only difference is that an exogenous equivalent of sulfide is required for the  
195 thioamidation reaction, rather than an adjacent beta-nucleophile-containing amino acid for  
196 azoline formation (Fig. 1).

197 Most YcaO cyclodehydratases require a partner protein for catalytic activity. The earliest  
198 investigated YcaO partner proteins are homologs of the ThiF/MoeB family, which are related to  
199 E1 ubiquitin-activating enzymes (26, 43). These YcaO partner proteins, as well as the more  
200 recently characterized “ocin-ThiF” variety (30), contain a ~90-residue domain referred to as the  
201 RiPP Recognition Element (RRE), which facilitates substrate recognition by interacting with the  
202 leader peptide. Considering these traits of azoline-forming YcaOs, it is possible that thioamide-  
203 forming YcaOs require the TfuA partner to facilitate binding to the peptidic substrate.  
204 Alternatively, TfuA may recruit and deliver sulfide equivalents by a direct or indirect  
205 mechanism. In this regard, it is noteworthy that the *ycaO-tfuA* locus can be found adjacent to  
206 genes involved in sulfur and molybdopterin metabolism (Fig. 2). Many of these genes encode



207 proteins with rhodanese-like homology domains, which are well-established sulfurtransferases.  
208 These enzymes typically carry sulfur in the form of a cysteine persulfide, a non-toxic but reactive  
209 equivalent of H<sub>2</sub>S (33, 44). Akin to rare cases of azoline-forming, partner-independent YcaOs,  
210 certain methanogens lack a bioinformatically identifiable TfuA (*e.g. Methanopyrus kandleri* and  
211 *Methanocaldococcus* sp.). Whether these proteins use an as yet unidentified protein or are truly  
212 independent sulfur insertion enzymes remains to be seen. Clearly, further *in vitro*  
213 experimentation will be required to delineate the precise role of TfuA in the thioamidation  
214 reaction.

215 The viability of the  $\Delta ycaO$ -*tfuA* mutant raises significant questions as to the role of  
216 thioglycine in the native MCR enzyme, especially considering its universal presence in all MCRs  
217 examined to date. We considered three hypotheses to explain this result. First, as we examined  
218 the previously suggested possibility that thioglycine modification is involved in enzyme catalysis  
219 (9, 13), which would be manifest in a slower reaction rate. As MCR is thought to be the rate-  
220 limiting step of methanogenesis (2, 3), this should be reflected in a corresponding decrease in the  
221 growth rate on various substrates, with more pronounced defects on substrates that lead to the  
222 fastest growth. Significantly, we observed the exact opposite, with the most pronounced defects  
223 being observed substrates that support the slowest growth rates in wild-type cells. Thus, loss of  
224 the thioglycine modification does not affect the rate-limiting step in growth and therefore is

225 unlikely to result in a slower enzyme. Next, we considered the possibility that thioglycine  
226 influences substrate affinity. If so, we expected that differences in metabolite pools caused by  
227 growth on different substrates might be reflected in altered growth patterns for the mutant. In  
228 particular,  $C_1$  units enter methanogenesis at the level of  $N^5$ -methyl-tetrahydrosarcinapterin ( $CH_3$ -  
229  $H_4SPT$ ) during growth on acetate, but at the level of methyl-CoM (45, 46) during growth on  
230 DMS, methanol and TMA (Fig. 5 – Supplemental Figure 1; (47, 48)). Significantly, these entry  
231 points are separated by an energy-dependent step that is coupled to production or consumption of  
232 the cross-membrane sodium gradient. As a result, intracellular levels of methyl-CoM, CoM and  
233 CoB could possibly be significantly different depending on the entry point into the methanogenic  
234 pathway. Because we observed growth defects on substrates that enter at both points (*i.e.* DMS  
235 and acetate), we suspect that the growth deficiency phenotype is unlikely to be related to changes  
236 in substrate affinity. However, we recognize that metabolite pools are also affected by the  
237 energetics of the methanogenic pathway. Indeed, the growth phenotypes were most severe for  
238 DMS and acetate, which are the substrates with the lowest available free energy. The Gibbs free  
239 energy ( $\Delta G^\circ$ ) for methanogenesis from acetate and DMS are -36 kJ/mol  $CH_4$  (49) and -49.2  
240 kJ/mol  $CH_4$  (50), respectively, which is considerably lower than the -102.5 kJ/mol  $CH_4$  and -77.6  
241 kJ/mol  $CH_4$  for methanol and TMA, respectively (51). Therefore, it remains possible that  
242 changes in the substrate pools are responsible for the substrate-dependent growth phenotypes. A

243 third explanation considered was that thioglycine increases the thermal stability of MCR. In this  
244 model, unstable MCR protein would need to be replaced more often, creating a significant  
245 metabolic burden for the mutant. Consistent with our results, this additional burden would be  
246 exacerbated on lower energy substrates like DMS and acetate, especially given the fact that  
247 MCR comprises *ca.* 10% of the cellular protein (52). Further, one would expect that a protein  
248 stability phenotype would be exaggerated at higher temperatures, which we observed during  
249 growth on methanol. Thus, multiple lines of evidence support the idea that the growth-associated  
250 phenotypes stemming from the deletion of TfuA and YcaO are caused by decreased MCR  
251 stability.

252 The chemical properties of amides relative to those of thioamides are consistent with our  
253 thermal stability hypothesis. Although amides tend to be planar, they have a low rotational  
254 barrier and are, thus, conformationally flexible. In contrast, thioamides have higher barriers to  
255 rotation and also lessened preference for the *s-cis* conformation (41). Moreover, sulfur has a  
256 larger van der Waals radius than oxygen resulting in a thioamide bond length that is ~40% longer  
257 than the amide bond (1.71Å versus 1.23Å) (53), which presents additional steric hindrances to  
258 backbone flexibility. Finally, the  $pK_a$  of thioamides is lower than the oxygen-containing  
259 counterpart, making thioglycine a stronger hydrogen bond donor than glycine (54), which again  
260 would reduce conformational flexibility. Taken together, it seems reasonable to conclude that the

261 increased flexibility of the unmodified glycine in the  $\Delta ycaO$ -*tfuA* mutant results in a protein that  
262 is prone to denaturation and enhanced rates of cellular degradation. A conclusive test of this  
263 hypothesis will require comprehensive biochemical and biophysical characterization of the MCR  
264 variant lacking the thioglycine modification, which is beyond the scope of this work.

265 Finally, the temperature-sensitive phenotype of the  $\Delta ycaO$ -*tfuA* mutant has potential  
266 implications regarding the evolution and ecology of methanogenic archaea. Based on this result,  
267 it seems reasonable to speculate that the thioglycine modification would be indispensable for  
268 thermophilic methanogens. It is often posited that the ancestor of modern methanogens was a  
269 thermophilic organism (55–57). If so, one would expect the thioglycine modification to be  
270 present in most methanogenic lineages, being stochastically lost due to genetic drift only in  
271 lineages that grow at low temperatures where the modification is not required. In contrast, if  
272 methanogenesis evolved in a cooler environment, one might expect the distribution of the  
273 modification to be restricted to thermophilic lineages. Thus, the universal presence of the  
274 thioglycine modification supports the thermophilic ancestry of methanogenesis. Indeed, the  
275 *ycaO*-*tfuA* locus is conserved even in *Methanococcoides burtonii*, a psychrophilic methanogen  
276 isolated from Ace Lake in Antarctica, where the ambient temperature is always below 2 °C (58).  
277 It will be interesting to see whether this modification is maintained by other methanogenic and  
278 methanotrophic archaea growing in low temperature environments.

## 279 **Materials and Methods**

280 **Bioinformatics analyses.** The 1,000 closest homologs were extracted from the NCBI  
281 non-redundant protein database using the YcaO amino acid sequence (MA0165) or the TfuA  
282 amino acid sequence (MA0164) as queries in BLAST-P searches. The amino acid sequences of  
283 these proteins were aligned using the MUSCLE plug-in (59) with default parameters in Geneious  
284 version R9 (60). Approximate maximum-likelihood trees were generated using FastTree version  
285 2.1.3 SSE3 using the Jones-Taylor-Thornton (JTT) model + CAT approximation with 20 rate  
286 categories. Branch support was calculated using the Shimodaira-Hasegawa (SH) test with 1,000  
287 resamples. Trees were displayed using Fig Tree v1.4.3 (<http://tree.bio.ed.ac.uk/software/figtree/>).

288 **Strains, media, and growth conditions.** All *M. acetivorans* strains were grown in  
289 single-cell morphology (61) in bicarbonate-buffered high salt (HS) liquid medium containing  
290 125 mM methanol, 50 mM trimethylamine hydrochloride (TMA), 40 mM sodium acetate, or 20  
291 mM dimethylsulfide (DMS). Cultures were grown in sealed tubes with N<sub>2</sub>/CO<sub>2</sub> (80/20) at 8-10 psi  
292 in the headspace. Most substrates were added to the medium prior to autoclaving. DMS was  
293 added from an anaerobic stock solution maintained at 4 °C immediately prior to inoculation.  
294 Growth rate measurements were conducted with three independent biological replicate cultures  
295 acclimated to the energy substrate or temperature as indicated. A 1:10 dilution of a late-  
296 exponential phase culture was used as the inoculum for growth rate measurement. Plating on HS

297 medium containing 50 mM TMA solidified with 1.7 % agar was conducted in an anaerobic glove  
298 chamber (Coy Laboratory Products, Grass Lake, MI) as described previously in (62). Solid  
299 media plates were incubated in an intra-chamber anaerobic incubator maintained at 37 °C with  
300 N<sub>2</sub>/CO<sub>2</sub>/H<sub>2</sub>S (79.9/20/0.1) in the headspace as described previously in (63). Puromycin  
301 (CalBiochem, San Diego, CA) was added to a final concentration of 2 µg/mL from a sterile,  
302 anaerobic stock solution to select for transformants containing the *pac* (puromycin  
303 transacetylase) cassette. The purine analog 8-aza-2,6-diaminopurine (8ADP) (R. I. Chemicals,  
304 Orange, CA) was added to a final concentration of 20 µg/mL from a sterile, anaerobic stock  
305 solution to select against the *hpt* (phosphoribosyltransferase) cassette encoded on pC2A-based  
306 plasmids. *E. coli* strains were grown in LB broth at 37 °C with standard antibiotic  
307 concentrations. WM4489, a DH10B derivative engineered to control copy-number of oriV-based  
308 plasmids (64), was used as the host strain for all plasmids generated in this study (Supplementary  
309 File 1). Plasmid copy number was increased dramatically by supplementing the growth medium  
310 with sterile rhamnose to a final concentration of 10 mM.

311 **Plasmids.** All plasmids used in this study are listed in Supplementary File 1. Plasmids for  
312 Cas9-mediated genome editing were designed as described previously in (40). Standard  
313 techniques were used for the isolation and manipulation of plasmid DNA. WM4489 was  
314 transformed by electroporation at 1.8 kV using an *E. coli* Gene Pulser (Bio-Rad, Hercules, CA).

315 All pDN201-derived plasmids were verified by Sanger sequencing at the Roy J. Carver  
316 Biotechnology Center, University of Illinois at Urbana-Champaign and all pAMG40 cointegrates  
317 were verified by restriction endonuclease analysis.

318 ***In silico* design of sgRNAs for gene-editing.** All target sequences used for Cas9-  
319 mediated genome editing in this study are listed in Supplementary File 2. Target sequences were  
320 chosen using the CRISPR site finder tool in Geneious version R9 (60). The *M. acetivorans*  
321 chromosome and the plasmid pC2A were used to score off-target binding sites.

322 **Transformation of *M. acetivorans*.** All *M. acetivorans* strains used in this study are  
323 listed in Supplementary File 3. Liposome-mediated transformation was used for *M. acetivorans*  
324 as described previously in (65) using 10 mL of late-exponential phase culture of *M. acetivorans*  
325 and 2  $\mu$ g of plasmid DNA for each transformation.

326 **In-gel tryptic digest of McrA.** Mid-exponential phase cultures of *M. acetivorans* grown  
327 in 10 mL HS medium containing 50 mM TMA were harvested by centrifugation at 5,000 RPM  
328 ( $3,000 \times g$ ) for 15 minutes in a Sorvall RC500 Plus centrifuge maintained at 4 °C (DuPont,  
329 Wilmington, DE) using a SS-34 rotor. The cell pellet was resuspended in 1 mL lysis buffer (50  
330 mM  $\text{NH}_4\text{HCO}_3$ , pH = 8.0) and harvested by centrifugation at 12,000 RPM ( $17,500 \times g$ ) for 30  
331 minutes in a Sorvall RC500 Plus centrifuge maintained at 4 °C (DuPont, Wilmington, DE) using  
332 a SS-34 rotor. An equal volume of the supernatant was mixed with 2x Laemmli sample buffer

333 (Bio-Rad, Hercules, CA) containing 5%  $\beta$ -mercaptoethanol, incubated in boiling water for 10  
334 mins, loaded on a 4-20% gradient Mini-Protean TGX denaturing SDS-PAGE gel (Bio-Rad,  
335 Hercules, CA) and run at 70 V until the dye-front reached the bottom of the gel. The gel was  
336 stained using the Gel Code Blue stain reagent (Thermo Fisher Scientific, Waltham, MA) as per  
337 the manufacturer's instructions. Bands corresponding to McrA (*ca.* 60 kDa) were excised and cut  
338 into *ca.* 1 × 1 mm cubes. The gel slices from a single well were destained with 50% acetonitrile,  
339 the corresponding protein was reduced with 10 mM DTT, and digested with 1.5  $\mu$ g sequencing-  
340 grade trypsin (Promega, Madison, WI) at 37 °C for 16-20 hours in the presence of 5% (*v/v*) *n*-  
341 propanol. The digested peptides were extracted and dried as described previously (66).

342 **MS analysis of tryptic peptides.** MALDI-TOF-MS analysis was performed using a  
343 Bruker UltrafleXtreme MALDI TOF-TOF mass spectrometer (Bruker Daltonics, Billerica, MA)  
344 in reflector positive mode at the University of Illinois School of Chemical Sciences Mass  
345 Spectrometry Laboratory. The samples were desalted using C-18 zip-tips using acetonitrile and  
346 water as solvent system and sinapic acid in 70% acetonitrile was used as the matrix. Data  
347 analysis was carried out using the Bruker FlexAnalysis software. For HR-ESI MS/MS, samples  
348 were dissolved in 35% aq. acetonitrile and 0.1% formic acid. Samples were directly infused  
349 using an Advion TriVersa Nanomate 100 into a ThermoFisher Scientific Orbitrap Fusion ESI-  
350 MS. The instrument was calibrated weekly, following the manufacturer's instructions, and tuned



351 daily with Pierce LTQ Velos ESI Positive Ion Calibration Solution (Thermo Fisher Scientific,  
352 Waltham, MA). The MS was operated using the following parameters: resolution, 100,000;  
353 isolation width (MS/MS), 1  $m/z$ ; normalized collision energy (MS/MS), 35; activation q value  
354 (MS/MS), 0.4; activation time (MS/MS), 30 ms. Data analysis was conducted using the  
355 Qualbrowser application of Xcalibur software (Thermo Fisher Scientific, Waltham, MA). HPLC-  
356 grade reagents were used to prepare samples for mass spectrometric analyses.

### 357 **Funding Information**

358 The authors acknowledge the Division of Chemical Sciences, Geosciences, and Biosciences,  
359 Office of Basic Energy Sciences of the U.S. Department of Energy through Grant DE-FG02-  
360 02ER15296 (to W.W.M) for the genetic and physiological studies in *Methanosarcina*  
361 *acetivorans*; the National Institutes of Health grant GM097142 (to D.A.M) for mass  
362 spectrometry experiments; and the Carl R. Woese Institute for Genomic Biology postdoctoral  
363 fellowship (to D.D.N). D.D.N is currently a Simons Foundation fellow of the Life Sciences  
364 Research Foundation. The funders had no role in study design, data collection and interpretation,  
365 or the decision to submit the work for publication.

### 366 **Acknowledgements**

367 We thank Graham A. Hudson (D.A.M. lab) for technical assistance with the HR and tandem MS  
368 data acquisition.

369 **References**

- 370 1. Ermler U, Grabarse W, Shima S, Goubeaud M, Thauer RK (1997) Crystal structure of  
371 Methyl-coenzyme M reductase : The key enzyme of biological methane formation.  
372 *Science* 278(5342):1457–1463.
- 373 2. Scheller S, Goenrich M, Boecher R, Thauer RK, Jaun B (2010) The key nickel enzyme of  
374 methanogenesis catalyses the anaerobic oxidation of methane. *Nature* 465(7298):606–608.
- 375 3. Wongnate T, Sliwa D, Ginovska B, Smith D, Wolf MW, Lehnert N, Raugei S, Ragsdale  
376 SW (2016) The radical mechanism of biological methane synthesis by methyl-coenzyme  
377 M reductase. *Science* 352(6288):953–958.
- 378 4. Thauer RK, Kaster A, Seedorf H, Buckel W, Hedderich R (2008) Methanogenic archaea:  
379 ecologically relevant differences in energy conservation. *Nature Rev Microbiol* 6(8):579–  
380 592.
- 381 5. Zheng K, Ngo PD, Owens VL, Yang X, Mansoorabadi SO (2016) The biosynthetic  
382 pathway of coenzyme F430 in methanogenic and methanotrophic archaea. *Science*  
383 354(6310):339-342.
- 384 6. Moore SJ, Sowa ST, Schuchardt C, Deery E, Lawrence AD, Ramos JV, Billig S,  
385 Birkemeyer C, Chivers PT, Howard MJ, Rigby SEJ, Layer G, Warren MJ (2017)  
386 Elucidation of the biosynthesis of the methane catalyst coenzyme F430. *Nature*  
387 543(7643):78–82.
- 388 7. Goubeaud M, Schreiner G, Thauer RK (1997) Purified methyl-coenzyme-M reductase is  
389 activated when the enzyme-bound coenzyme F430 is reduced to the nickel(I) oxidation  
390 state by titanium(III) citrate. *Eur J Biochem* 243:110–114.
- 391 8. Selmer T, Kahnt J, Goubeaud M, Shima S, Grabarse W, Ermler U, Thauer RK (2000) The  
392 biosynthesis of methylated amino acids in the active site region of methyl-coenzyme M  
393 reductase. *J Biol Chem* 275(6):3755–3760.
- 394 9. Kahnt J, Buchenau B, Mahlert F, Krüger M, Shima S, Thauer RK (2007) Post-  
395 translational modifications in the active site region of methyl-coenzyme M reductase from  
396 methanogenic and methanotrophic archaea. *FEBS J* 274(18):4913–4921.
- 397 10. Wagner T, Kahnt J, Ermler U, Shima S (2016) Didehydroaspartate modification in  
398 methyl-coenzyme M reductase catalyzing methane formation. *Angew Chemie - Int Ed*  
399 55(36):10630–10633.
- 400 11. Grabarse W, Mahlert F, Shima S, Thauer RK, Ermler U (2000) Comparison of three  
401 methyl-coenzyme M reductases from phylogenetically distant organisms : unusual amino  
402 acid modification , conservation and adaptation. *J Mol Biol* 303(2):329-344
- 403 12. Grabarse W, Mahlert F, Duin EC, Goubeaud M, Shima S, Thauer RK, Lamzin V, Ermler

- 404 U (2001) On the mechanism of biological methane formation: structural evidence for  
405 conformational changes in methyl-coenzyme M reductase upon substrate binding. *J Mol*  
406 *Biol* 309(1):315–330.
- 407 13. Horng Y, Becker DF, Ragsdale SW (2001) Mechanistic studies of methane biogenesis by  
408 methyl-coenzyme M reductase: evidence that coenzyme B participates in cleaving the C -  
409 S Bond of methyl-coenzyme M. *Biochemistry* 40(43):12875–12885.
- 410 14. Pan M, Mabry TJ, Beale JM, Mamiya BM (1997) Nonprotein amino acids from *Cycas*  
411 *revoluta*. *Phytochemistry* 45(3):517–519.
- 412 15. Hayakawa Y, Sasaki K, Nagai K, Shin-ya K, Furihata K (2006) Structure of  
413 thioviridamide, a novel apoptosis inducer from *Streptomyces olivoviridis*. *J Antibiot*  
414 59(1):6–10.
- 415 16. Kim HJ, Graham DW, DiSpirito AA, Alterman MA, Galeva N, Larive CK, Asunskis D,  
416 Sherwood PMA (2004) Methanobactin, a copper-acquisition compound from methane-  
417 oxidizing bacteria. *Science* 305(5690):1612–1615.
- 418 17. Kenney GE, Rosenzweig AC (2012) Chemistry and biology of the copper chelator  
419 methanobactin. *ACS Chem Biol* 7(2):260-268.
- 420 18. Kenney GE, Rosenzweig AC (2013) Genome mining for methanobactins. *BMC Biology*  
421 11(1):17.
- 422 19. Lincke T, Behnken S, Ishida K, Roth M, Hertweck C (2013) Closthioamide : an  
423 unprecedented polythioamide antibiotic from the strictly anaerobic bacterium *Clostridium*  
424 *cellulolyticum*. *Angew Chemie Int Ed* 122(11):2055-2057.
- 425 20. Chiriac AI, Kloss F, Kramer J, Vuong C, Hertweck C, Sahl H-G (2015) Mode of action of  
426 closthioamide: the first member of the polythioamide class of bacterial DNA gyrase  
427 inhibitors. *J Antimicrob Chemother* 70:2576–2588.
- 428 21. Coyne S, Litomska A, Chizzali C, Khalil MNA, Richter K, Beerhues L, Hertweck C.  
429 (2014). Control of plant defense mechanisms and fire blight pathogenesis through the  
430 regulation of 6-thioguanine biosynthesis in *Erwinia amylovora*. *ChemBioChem*  
431 15(3):373–376.
- 432 22. Puar MS, Ganguly AK, Afonso A, Brambilla R, Mangiaracina P (1981) Sch 18640. A  
433 new thiostrepton-type antibiotic. *J Am Chem Soc* 103(17):5231–5233.
- 434 23. Hensens OD, Albers-Schönberg G (1983) Total structure of the highly modified peptide  
435 antibiotic components of thiopeptin. *J Antibiot* 36(7):814–831.
- 436 24. Izawa M, Kawasaki T, Hayakawa Y (2013) Cloning and heterologous expression of the  
437 thioviridamide biosynthesis gene cluster from *Streptomyces olivoviridis*. *Appl Environ*  
438 *Microbiol* 79(22):7110–7113.
- 439 25. Dunbar KL, Melby JO, Mitchell DA (2012) YcaO domains use ATP to activate amide

- 440 backbones during peptide cyclodehydrations. *Nat Chem Biol* 8(6):569–575.
- 441 26. Dunbar KL, Chekan JR, Cox CL, Burkhart BJ, Nair SK, Mitchell DA (2014) Discovery of  
442 a new ATP-binding motif involved in peptidic azoline biosynthesis. *Nat Chem Biol*  
443 10(10):823–829.
- 444 27. Arnison PG, Bibb MJ, Bierbaum G, Bowers A a, Bugni TS, Bulaj G, Camarero JA,  
445 Campopiano DJ, Challis GL, Clardy J, Cotter PD, Craik DJ, Dawson M, Dittmann E,  
446 Donadio S, Dorrestein PC, Entian K-D, Fischbach M a, Garavelli JS, Göransson U,  
447 Gruber CW, Haft DH, Hemscheidt TK, Hertweck C, Hill C, Horswill AR, Jaspars M,  
448 Kelly WL, Klinman JP, Kuipers OP, Link a J, Liu W, Marahiel M a, Mitchell D a, Moll  
449 GN, Moore BS, Müller R, Nair SK, Nes IF, Norris GE, Olivera BM, Onaka H, Patchett  
450 ML, Piel J, Reaney MJT, Rebuffat S, Ross RP, Sahl H-G, Schmidt EW, Selsted ME,  
451 Severinov K, Shen B, Sivonen K, Smith L, Stein T, Süssmuth RD, Tagg JR, Tang G-L,  
452 Truman AW, Vederas JC, Walsh CT, Walton JD, Wenzel SC, Willey JM, van der Donk  
453 WA (2013) Ribosomally synthesized and post-translationally modified peptide natural  
454 products: overview and recommendations for a universal nomenclature. *Nat Prod Rep*  
455 30(1):108–160.
- 456 28. Burkhart BJ, Schwalen CJ, Mann G, Naismith JH, Mitchell DA. 2017. YcaO-dependent  
457 posttranslational amide activation: biosynthesis, structure, and function. *Chem Rev* DOI:  
458 10.1021/acs.chemrev.6b00623.
- 459 29. Burkhart BJ, Hudson GA, Dunbar KL, Mitchell DA (2015) A prevalent peptide-binding  
460 domain guides ribosomal natural product biosynthesis. *Nat Chem Biol* 11(8):564–570.
- 461 30. Dunbar KL, Tietz JI, Cox CL, Burkhart BJ, Mitchell DA (2015) Identification of an  
462 auxiliary leader peptide-binding protein required for azoline formation in ribosomal  
463 natural products. *J Am Chem Soc* 137(24):7672–7677.
- 464 31. Wright CM, Christman GD, Snellinger AM, Johnston M V, Mueller EG (2006) Direct  
465 evidence for enzyme persulfide and disulfide intermediates during 4-thiouridine  
466 biosynthesis. *Chem Commun* 29:3104–3106.
- 467 32. Coyne S, Chizzali C, Khalil MNA, Litomska A, Richter K, Beerhues L, Hertweck C  
468 (2013) Biosynthesis of the antimetabolite 6-thioguanine in *Erwinia amylovora* plays a key  
469 role in fire blight pathogenesis. *Angew Chemie - Int Ed* 125(40):10564–10568.
- 470 33. Palenchar PM, Buck CJ, Cheng H, Larson TJ, Mueller EG (2000) Evidence that ThiI, an  
471 enzyme shared between thiamin and 4-thiouridine biosynthesis, may be a sulfurtransferase  
472 that proceeds through a persulfide intermediate. *J Biol Chem* 275(12):8283–8286.
- 473 34. Basu MK, Selengut JD, Haft DH (2011) ProPhylo : partial phylogenetic profiling to guide  
474 protein family construction and assignment of biological process. *BMC Bioinformatics*  
475 12(1):434.

- 476 35. Borrel G, O'Toole PW, Harris HMB, Peyret P, Brugère JF, Gribaldo S Borrel G. (2013)  
477 Phylogenomic data support a seventh order of methylotrophic methanogens and provide  
478 insights into the evolution of methanogenesis. *Genome Biol Evol* 5(10):1769–1780.
- 479 36. Vanwonterghem I, Evans PN, Parks DH, Jensen PD, Woodcroft BJ, Hugenholtz P, Tyson  
480 GW (2016) Methylotrophic methanogenesis discovered in the archaeal phylum  
481 Verstraetearchaeota. *Nat Microbiol* 1:16170.
- 482 37. Zhang W, Urban A, Mihara H, Leimkühler S, Kurihara T, Esaki N. (2010) IscS functions  
483 as a primary sulfur-donating enzyme by interacting specifically with *moeB* and *moaD* in  
484 the biosynthesis of molybdopterin in *Escherichia coli*. *J Biol Chem* 285(4):2302–2308.
- 485 38. Park JH, Dorrestein PC, Zhai H, Kinsland C, McLafferty FW, Begley TP (2003)  
486 Biosynthesis of the thiazole moiety of thiamin pyrophosphate (vitamin B1). *Biochemistry*  
487 42 (42):12430–12438.
- 488 39. Guss AM, Rother M, Zhang JK, Kulkarni G, Metcalf WW (2008) New methods for  
489 tightly regulated gene expression and highly efficient chromosomal integration of cloned  
490 genes for *Methanosarcina* species. *Archaea* 2(3):193–203.
- 491 40. Nayak DD, Metcalf WW (2017) Cas9-mediated genome editing in the methanogenic  
492 archaeon *Methanosarcina acetivorans*. *Proc Natl Acad Sci* DOI:  
493 10.1073/pnas.1618596114
- 494 41. Wiberg KB, Rablen PR (1995) Why does thioformamide have a larger rotational barrier  
495 than formamide? *J Am Chem Soc* 117(8):2201–2209.
- 496 42. Perler FB, Xu MQ, Paulus H (1997) Protein splicing and autoproteolysis mechanisms.  
497 *Curr Opin Chem Biol* 1(3):292–299.
- 498 43. Schulman BA, Wade Harper J (2009) Ubiquitin-like protein activation by E1 enzymes:  
499 the apex for downstream signalling pathways. *Nat Rev Mol Cell Biol* 10(5):319–331.
- 500 44. Matthies A, Nimtz M, Leimkühler S (2005) Molybdenum cofactor biosynthesis in  
501 humans: Identification of a persulfide group in the rhodanese-like domain of MOCS3 by  
502 mass spectrometry. *Biochemistry* 44(21):7912–7920.
- 503 45. Galagan JE, Nusbaum C, Roy A, Endrizzi MG, Macdonald P, Fitzhugh W, Calvo S,  
504 Engels R, Smirnov S, Atnoor D, Brown A, Allen N, Naylor J, Stange-thomann N,  
505 Dearellano K, Johnson R, Linton L, Mcewan P, Mckernan K, Talamas J, Tirrell A, Ye W,  
506 Zimmer A, Barber RD, Cann I, Graham DE, Grahame DA, Guss AM, Hedderich R,  
507 Ingram-smith C, Kuettner HC, Krzycki JA, Leigh JA, Li W, Liu J, Mukhopadhyay B,  
508 Reeve JN, Smith K, Springer TA, Umayam LA, White O, White RH, Macario EC De,  
509 Ferry JG, Jarrell KF, Jing H, Macario AJL, Paulsen I, Pritchett M, Sowers KR, Swanson R  
510 V, Zinder SH, Lander E, Metcalf WW, Birren B (2002) The Genome of *M. acetivorans*  
511 reveals extensive metabolic and physiological diversity. *Genome Research* 12(4):532–

- 512 542.
- 513 46. Deppenmeier U, Lienard T, Gottschalk G (1999) Novel reactions involved in energy  
514 conservation by methanogenic archaea. *FEBS Lett* 457(3):291-297.
- 515 47. Bose A, Pritchett MA, Metcalf WW (2008) Genetic analysis of the methanol- and  
516 methylamine-specific methyltransferase 2 genes of *Methanosarcina acetivorans* C2A. *J*  
517 *Bacteriol* 190(11):4017–4026.
- 518 48. Fu H, Metcalf WW (2015) Genetic basis for metabolism of methylated sulfur compounds  
519 in *Methanosarcina* species. *J Bacteriol* 197(8):1515–1524.
- 520 49. Schönheit P, Kristjansson JK, Thauer RK (1982) Kinetic mechanism for the ability of  
521 sulfate reducers to out-compete methanogens for acetate. *Arch Microbiol* 132(3):285–288.
- 522 50. Finster K, Tanimoto T, Bak F (1992) Fermentation of methanethiol and dimethylsulfide  
523 by a newly isolated methanogenic bacterium. *Arch Microbiol* 152(5):425–430.
- 524 51. Patterson JA, Hespell RB (1979) Trimethylamine and methylamine as growth substrates  
525 for rumen bacteria and *Methanosarcina barkeri*. *Curr Microbiol* 3(2):79–83.
- 526 52. Rospert S, Linder D, Ellerman J, Thauer RK (1990) Two genetically distinct methyl-  
527 coenzyme M reductases in *Methanobacterium thermoautotrophicum* strain Marburg  
528 and  $\Delta H$ . *Eur J Biochem* 194(3):871–877.
- 529 53. Petersson EJ, Goldberg JM, Wissner RF (2014) On the use of thioamides as fluorescence  
530 quenching probes for tracking protein folding and stability. *Phys Chem Chem Phys*  
531 16(15):6827–6837.
- 532 54. Lee HJ, Choi YS, Lee KB, Park J, Yoon CJ (2002) Hydrogen bonding abilities of  
533 thioamide. *J Phys Chem A* 106(30):7010–7017.
- 534 55. Gribaldo S, Brochier-Armanet C (2006) The origin and evolution of Archaea: a state of  
535 the art. *Philos Trans R Soc B* 361(1470):1007–1022.
- 536 56. Forterre P (2015) The universal tree of life: an update. *Front Microbiol* 6:1–18.
- 537 57. Weiss MC, Sousa FL, Mrnjavac N, Neukirchen S, Roettger M, Nelson-Sathi S, Martin  
538 WF(2016) The physiology and habitat of the last universal common ancestor. *Nat*  
539 *Microbiol* 1:16116.
- 540 58. Franzmann PD, Springer N, Ludwig W, Conway De Macario E, Rohde M (1992) A  
541 methanogenic archaeon from Ace Lake, Antarctica: *Methanococoides burtonii* sp. nov.  
542 *Syst Appl Microbiol* 15(4):573–581.
- 543 59. Edgar RC (2004) MUSCLE: Multiple sequence alignment with high accuracy and high  
544 throughput. *Nucleic Acids Res* 32(5):1792–1797.
- 545 60. Kearse M, Moir R, Wilson A, Stones-Havas S, Cheung M, Sturrock S, Buxton S, Cooper  
546 A, Markowitz S, Duran C, Thierer T, Ashton B, Meintjes P, Drummond A. (2012)  
547 Geneious Basic: An integrated and extendable desktop software platform for the



- 548 organization and analysis of sequence data. *Bioinformatics* 28(12):1647–1649.
- 549 61. Sowers KR, Boone JE, Gunsalus RP (1993) Disaggregation of *Methanosarcina* spp. and  
550 growth as single cells at elevated osmolarity. *Appl Environ Microbiol* 59(11):3832–3839.
- 551 62. Metcalf WW, Zhang JK, Shi X, Wolfe RS (1996) Molecular, genetic, and biochemical  
552 characterization of the *serC* gene of *Methanosarcina barkeri* Fusaro. *J Bacteriol*  
553 178(19):5797–5802.
- 554 63. Metcalf WW, Zhang JK, Wolfe RS (1998) An anaerobic, intrachamber incubator for  
555 growth of *Methanosarcina* spp. on methanol-containing solid media. *Appl Environ*  
556 *Microbiol* 64(2):768–770.
- 557 64. Kim SY, Ju KS, Metcalf WW, Evans BS, Kuzuyama T, Van Der Donk WA. (2012)  
558 Different biosynthetic pathways to fosfomycin in *Pseudomonas syringae* and  
559 *Streptomyces* species. *Antimicrob Agents Chemother* 56(8):4175–4183.
- 560 65. Metcalf WW, Zhang J, Apolinario E, Sowers KR, Wolfe RS (1997) A genetic system for  
561 Archaea of the genus *Methanosarcina*: Liposome-mediated transformation and  
562 construction of shuttle vectors. *Proc Natl Acad. Sci* 94(6):2626–2631.
- 563 66. Shevchenko A, Tomas H, Havlis J, Olsen JV, Mann M (2006) In-gel digestion for mass  
564 spectrometric characterization of proteins and proteomes. *Nat Protoc* 1(6):2856–2860.  
565

566 **Figure Legends**

567 **Figure 1. Comparison of reactions catalyzed by YcaO proteins.** *Top*, Biochemically  
568 characterized YcaO proteins involved in the synthesis of azol(in)e-containing ribosomal natural  
569 products catalyze the ATP-dependent cyclodehydration of cysteine, serine, and threonine  
570 residues. Shown is the conversion of peptidic cysteine to thiazoline. This reaction proceeds via  
571 an *O*-phosphorylated hemiorthoamide intermediate. *Bottom*, An analogous reaction is believed to  
572 occur in the biosynthesis of the thioamide bond in thioviridamide. Rather than an adjacent  
573 cysteine acting as the nucleophile, an exogenous source of sulfide ( $S^{2-}$ ) is required for this  
574 reaction. TfuA may mediate the delivery of sulfide equivalents for this reaction.

575 **Figure 2. A maximum-likelihood phylogenetic tree of YcaO homologs in archaea.** Taxa in  
576 green, blue, and orange depict methanogens and anaerobic methane oxidizing archaea (ANMEs)  
577 with sequenced genomes. Taxa shown in green contain a single copy of *ycaO* and *tfuA*, those in  
578 blue contain two copies of *ycaO* and one copy of *tfuA*, while those in orange contain one copy of  
579 *ycaO*, but do not encode *tfuA*. Taxa shown in pink are other archaea that also encode *ycaO* and  
580 *tfuA* homologs. The gene neighborhoods of selected taxa are also depicted, showing the common  
581 co-localization with genes annotated as having a role in sulfur metabolism or methanogenesis.  
582 The node labels indicate support values calculated using the Shiomdaira-Hasegawa test using



583 1000 resamples. Support values less than 0.5 have not been shown. The outgroup denotes a  
584 variety of bacterial taxa.

585 **Figure 3. Panel A**, Experimental strategy for deletion of the *ycaO-tfuA* locus in *M. acetivorans*  
586 using a Cas9-mediated genome editing technique. Co-expression the Cas9 protein along with a  
587 single guide RNA (sgRNAs) with a 20 bp target sequence flanked by a 3' NGG protospacer  
588 adjacent motif on the chromosome (PAM; in red) generates double-stranded breaks (DSBs) at  
589 the *ycaO-tfuA* locus. Repair of this break via homologous recombination with an appropriate  
590 repair template (HR Template) generates an in-frame deletion on the host chromosome. **Panel B**,  
591 A Cas9-based assay for gene essentiality. Mean transformation efficiencies of plasmids with  
592 (dark gray) or without (light gray) an appropriate repair template are shown. The known essential  
593 gene *mcrA* is included as a positive control. The error bars represent one standard deviation of  
594 three independent transformations.

595 **Figure 4. MALDI-TOF MS analysis of McrA.** *Top*, Spectrum obtained from WT tryptic  
596 digests containing the thioglycine modified L461-R491 peptide ( $m/z$  3432 Da). A small amount  
597 of the unmodified L<sub>461</sub>-R<sub>491</sub> peptide ( $m/z$  3416 Da) is also observed, which probably arises via  
598 non-enzymatic hydrolysis of the thioamide bond as previously reported (9). *Bottom*, Spectrum  
599 obtained from  $\Delta ycaO-tfuA$  tryptic digests containing only the unmodified L461-R491 peptide

600 ( $m/z$  3416 Da). The  $m/z$  3375 Da species present in both samples corresponds to MCR $\alpha$  residues

601 D392-R421.

602 **Figure 5.** Growth rate of the WWM60 (WT; blue) and the  $\Delta ycaO$ -*tfuA* mutant (green) in HS

603 medium with 125 mM methanol at the indicated temperatures. A statistically significant

604 difference ( $p < 0.01$ ) using a two-tailed unpaired t-test is indicated with an \*.

605 **Tables**

606 **Table 1:** Growth phenotypes of WWM60 (WT) and WWM992 (*ΔycaO-tfuA*) on different  
 607 substrates at 36 °C.

| Substrate <sup>a</sup> | Strain            | Doubling Time (h) <sup>b</sup> | p-value           | Maximum<br>OD <sub>600</sub> <sup>b</sup> | p-value           |
|------------------------|-------------------|--------------------------------|-------------------|-------------------------------------------|-------------------|
| <b>Methanol</b>        | WT                | 6.94 ± 0.41                    | 0.87              | 5.35 ± 0.31                               | 0.26              |
|                        | <i>ΔycaO-tfuA</i> | 6.89 ± 0.15                    |                   | 5.06 ± 0.39                               |                   |
| <b>TMA</b>             | WT                | 10.92 ± 0.54                   | 0.84              | 9.57 ± 0.67                               | 0.31              |
|                        | <i>ΔycaO-tfuA</i> | 10.98 ± 0.43                   |                   | 8.91 ± 0.73                               |                   |
| <b>Acetate</b>         | WT                | 54.23 ± 4.03                   | <b>0.0002</b>     | 0.44 ± 0.01                               | <b>0.0005</b>     |
|                        | <i>ΔycaO-tfuA</i> | 124.33 ± 12.52                 |                   | 0.35 ± 0.02                               |                   |
| <b>DMS</b>             | WT                | 31.27 ± 1.28                   | <b>&lt;0.0001</b> | 0.60 ± 0.01                               | <b>&lt;0.0001</b> |
|                        | <i>ΔycaO-tfuA</i> | 58.28 ± 1.45                   |                   | 0.44 ± 0.01                               |                   |

608 <sup>a</sup>TMA, trimethylamine; DMS, dimethylsulfide.

609 <sup>b</sup>The error represents the 95% confidence interval of the mean for three biological replicates and  
 610 the p-values were calculated using two-tailed unpaired t-tests.

611

612 **Supplementary Files**

613 **Supplementary File 1**– Lists of plasmids

614 **Supplementary File 2** – List of target sequences for Cas9-mediated genome editing

615 **Supplementary File 3** – List of strains

616

617 **Legends for Figure Supplements**

618 **Figure 2 – Supplementary Figure 1. Panel A)** Unrooted maximum-likelihood phylogeny of  
619 1,000 YcaO sequences retrieved from the NCBI non-redundant protein sequence database using  
620 the corresponding sequence from *Methanosarcina acetivorans* as a search query. **Panel B)**  
621 Unrooted maximum-likelihood phylogeny of 1,000 TfuA sequences retrieved from the NCBI  
622 non-redundant protein sequence database using the corresponding sequence from *M. acetivorans*  
623 as a search query. Divergent archaea-derived sequences in the TfuA tree are denoted with an \*.

624

625 **Figure 2 – Supplementary Figure 2.** Unrooted maximum-likelihood phylogeny of 1,000 TfuA  
626 sequences retrieved from the NCBI non-redundant protein sequence database using the  
627 corresponding sequence from *Methanosarcina acetivorans* as a search query. For taxa where  
628 *tfuA* and *ycaO* are not adjacently encoded genes a gene architecture diagram is shown. The node  
629 labels indicate support values calculated using the Shimodaira-Hasegawa test using 1000  
630 resamples. Support values less than 0.5 have not been shown. The outgroup is comprised of  
631 various bacterial TfuA protein sequences.

632

633 **Figure 3 – Supplementary Figure 1.** A PCR-based screen to genotype the *ycaO-tfuA* locus in  
634 *Methanosarcina acetivorans*. The PCR amplicon from three independently derived mutants  
635 containing an unmarked in-frame deletion of *ycaO-tfuA* (Lanes 2-4) is 2980 bp whereas the  
636 corresponding amplicon from a strain containing the wild-type locus is 4742 bp (Lane 5). Lanes  
637 1 and 6 contain a 1 kb DNA ladder.

638

639 **Figure 4 – Supplementary Figure 1. Panel A)** High-resolutions electrospray ionization tandem  
640 mass spectrometry (HR-ESI MS/MS) analysis of a wild-type tryptic peptide from  
641 *Methanosarcina acetivorans* McrA (L<sub>461</sub>-R<sub>491</sub>,  $m/z$  3432 Da). The b<sub>6</sub> ion localizes the thioamide  
642 modification to Gly<sub>465</sub>. No b<sub>5</sub> ion was detected suggesting negligible fragmentation at the  
643 thioamide bond. Predicted masses and associated errors are shown. **Panel B)** HR-ESI-MS/MS  
644 analysis of the corresponding McrA tryptic peptide from the  $\Delta ycaO$ -*tfuA* deletion strain of *M.*  
645 *acetivorans* ( $m/z$  3416 Da). The b<sub>5</sub> and b<sub>6</sub> ion localizes the amide functionality at Gly<sub>465</sub>.  
646 Predicted masses and associated errors are shown.

647

648 **Figure 4 – Supplementary Figure 2.** HR-ESI-MS/MS of the tryptic peptide from  
649 *Methanosarcina acetivorans* McrA (D<sub>392</sub>-R<sub>421</sub>,  $m/z$  3375 Da) present in both the wild-type and  
650  $\Delta ycaO$ -*tfuA* deletion strain. Predicted masses and associated errors are shown.

651

652 **Figure 4 – Supplementary Figure 3. Panel A)** Matrix-assisted laser desorption/ionization time-  
653 of-flight mass spectrometry (MALDI-TOF MS) analysis of the wild-type (WT, top) and  $\Delta ycaO$ -  
654 *tfuA* deletion strain (bottom) spectra identify the McrA tryptic peptide, H<sub>271</sub>-R<sub>284</sub> ( $m/z$  1496 Da),  
655 containing the known *N*-methylhistidine modification. This suggests that the thioglycine  
656 formation is not a prerequisite for this methylation event. **Panel B)** MALDI-TOF MS analysis of  
657 the WT (top) and  $\Delta ycaO$ -*tfuA* deletion strain (bottom) spectra identify the McrA tryptic peptide,  
658 F<sub>408</sub>-R<sub>421</sub>, ( $m/z$  1561 Da). This peptide has been reported to contain a  $\beta$ -methylation at Q420 in  
659 other methanogens (9), however, it remains unmodified in *M. acetivorans*.

660

661 **Figure 5 – Supplementary Figure 1.** An overview of methanogenic metabolism in *M.*  
662 *acetivorans*. Methylophilic substrates such as methanol (CH<sub>3</sub>OH) or dimethylsulfide (DMS)

663 enter the methanogenic pathway via *S*-methylation of coenzyme M (CoM) and subsequent  
664 disproportionation to methane (CH<sub>4</sub>) and carbon dioxide (CO<sub>2</sub>; metabolic flux is shown as blue  
665 arrows). Notably, the first step in oxidation of CH<sub>3</sub>-CoM to CO<sub>2</sub> is the energy-requiring transfer  
666 of the methyl moiety to generate methyl-tetrahydrosarcinapterin (CH<sub>3</sub>-H<sub>4</sub>Spt). In contrast, acetic  
667 acid enters the pathway at the CH<sub>3</sub>-H<sub>4</sub>Spt level, followed by reduction to CH<sub>4</sub> (green arrows).  
668 Thus, the second step of the pathway is exergonic.

# Figure 1

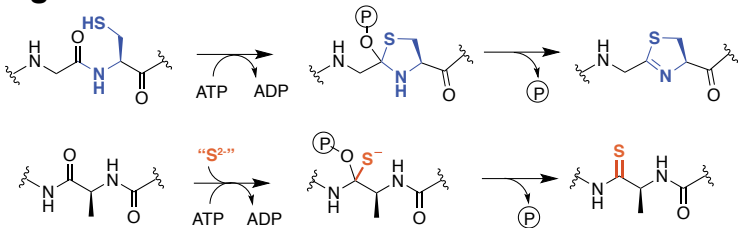

**Fig. 1:** Comparison of reactions catalyzed by YcaO proteins. **Top,** Biochemically characterized YcaO proteins involved in the synthesis of thiazole/oxazole modified microcin natural products catalyze the ATP-dependent cyclodehydration of peptidic cysteines to thiazolines. This reaction proceeds via an O-phosphorylated hemiorthoamide intermediate. **Bottom,** An analogous reaction is believed to occur in the synthesis of thioviridamide. Rather than an adjacent cysteine providing the nucleophile, an exogenous source of sulfide ( $S^{2-}$ ), which may be delivered by TfuA, is required.



# Figure 2

bioRxiv preprint doi: <https://doi.org/10.1101/121111>; this version posted March 27, 2017. The copyright holder for this preprint (which was not certified by peer review) is the author/funder, who has granted bioRxiv a license to display the preprint in perpetuity. It is made available under aCC-BY 4.0 International license.

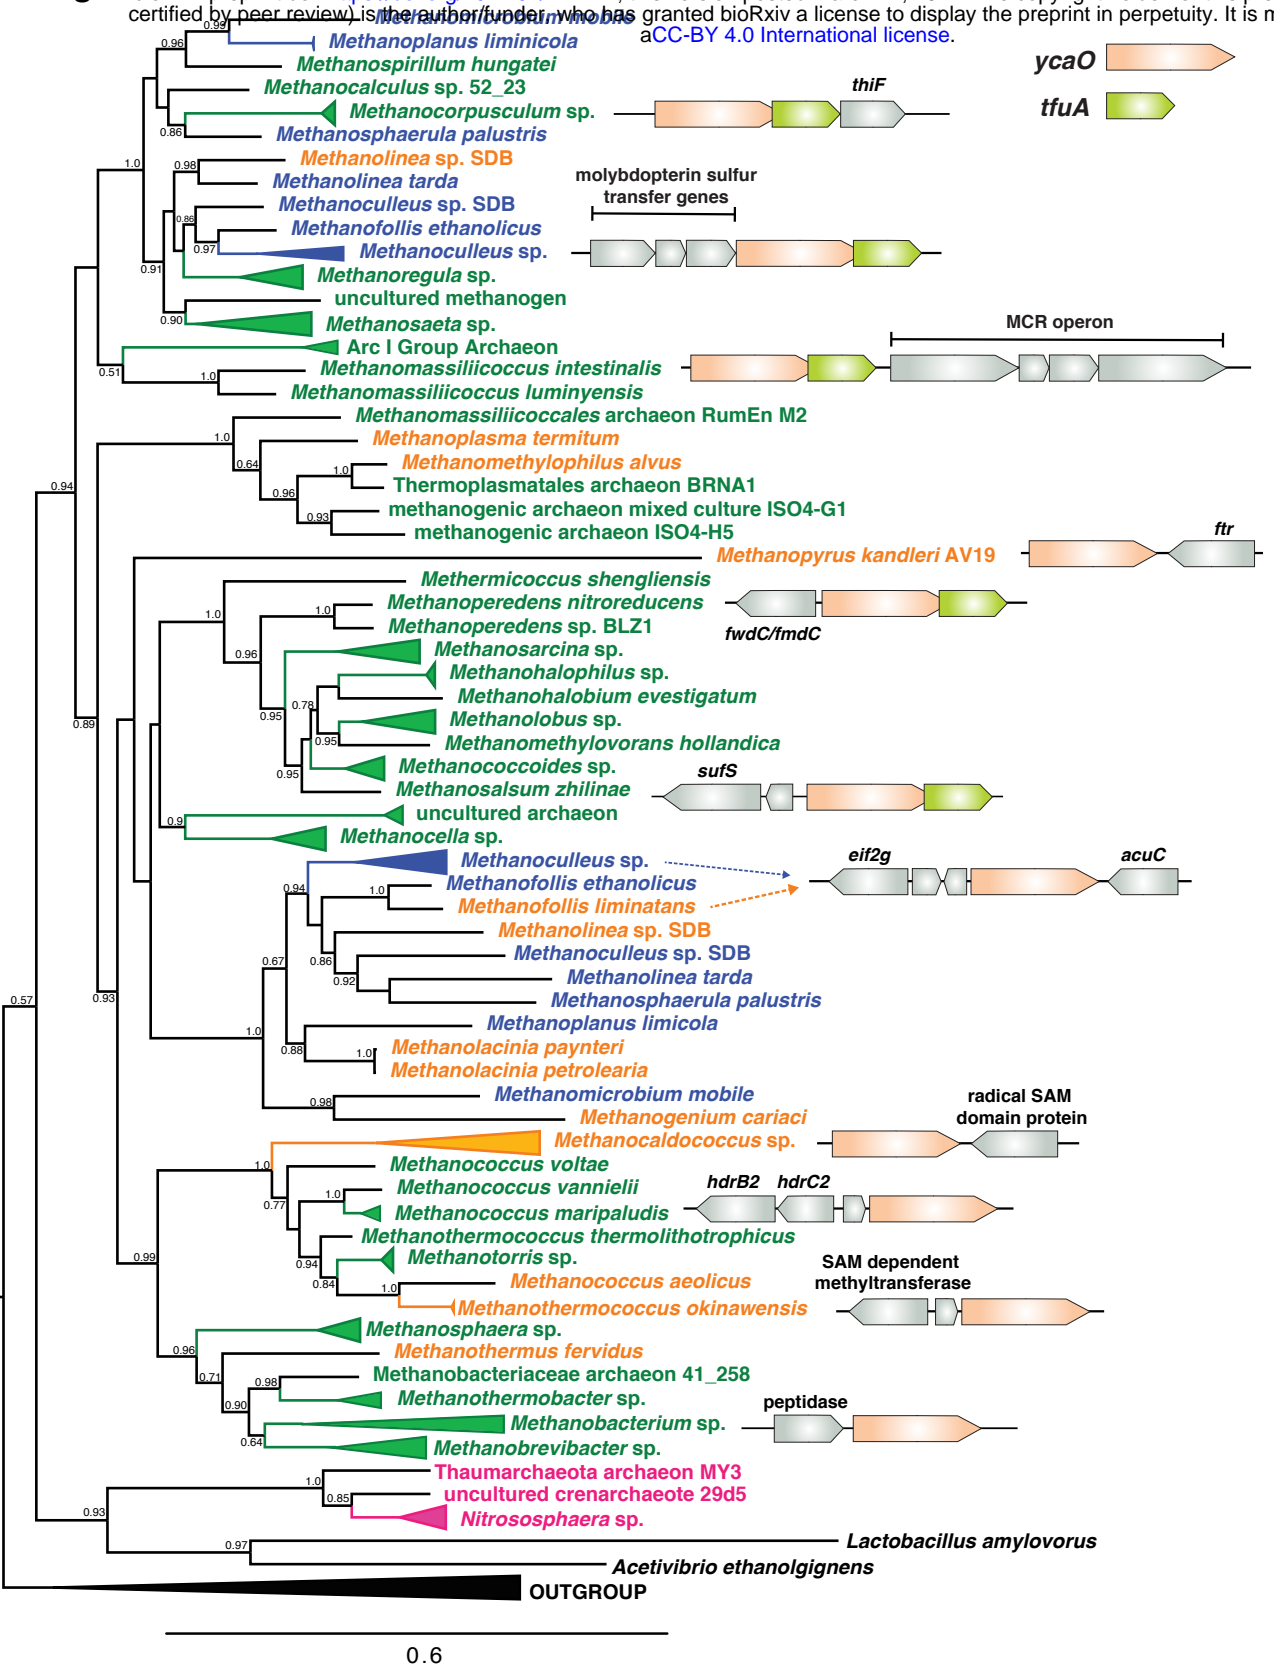

**Fig. 2:** A maximum-likelihood phylogenetic tree of YcaO homologs in archaea. Taxa in green, blue, and orange depict methanogens and anaerobic methane oxidizing archaea (ANMEs) with completely sequenced genomes. Taxa shown in green contain a single copy of *ycaO* and *tfuA*, those in blue contain two copies of *ycaO* and one copy of *tfuA*, while those in orange contain one copy of *ycaO*, but do not encode *tfuA*. Taxa shown in pink are other archaea that also encode *ycaO* and *tfuA* homologs. The gene neighborhoods of selected taxa are also depicted, showing the common co-localization with genes annotated as having a role in sulfur metabolism or methanogenesis. The node labels indicate support values calculated using the Shimodaira-Hasegawa test using 1000 resamples. Support values less than 0.5 have not been shown. The outgroup denotes a variety of bacterial taxa.

**Panel A**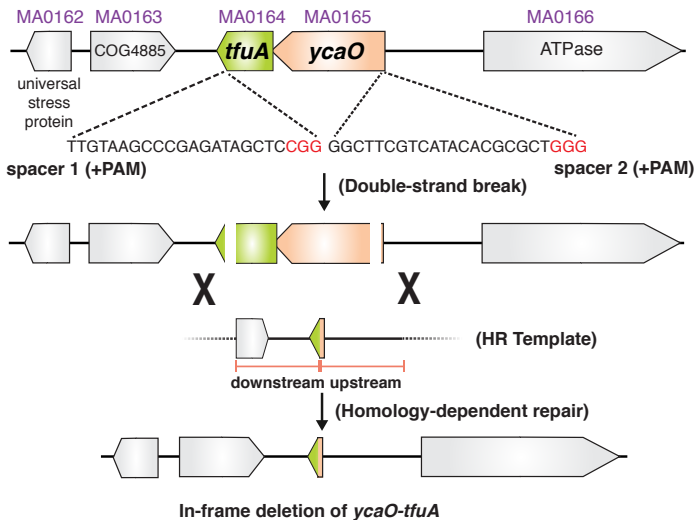**Panel B**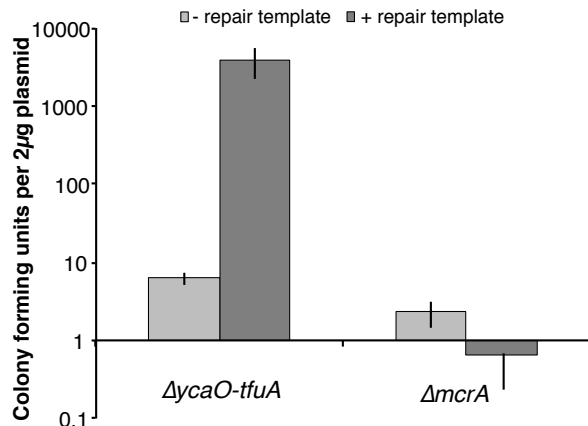

**Fig. 3: Panel A**, Experimental strategy for deletion of the *ycaO-tfuA* locus in *M. acetivorans* using a Cas9-mediated genome editing technique. Co-expression of the Cas9 protein along with a single guide RNA (sgRNAs) with a 20 bp target sequence flanked by a 3' NGG protospacer adjacent motif on the chromosome (PAM; in red) generates double-stranded breaks (DSBs) at the *ycaO-tfuA* locus. Repair of this break via homologous recombination with an appropriate repair template (HR Template) generates an in-frame deletion on the host chromosome. **Panel B**, A Cas9-based assay for gene essentiality. Mean transformation efficiencies of plasmids with (dark gray) or without (light gray) an appropriate repair template are shown. The known essential gene *mcrA* is included as a positive control. The error bars represent one standard deviation of three independent transformations.

## Figure 4

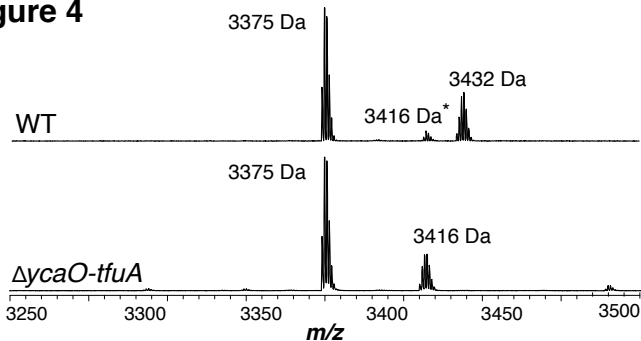

**Fig. 4:** MALDI-TOF MS analysis of MCR $\alpha$ . **Top,** Spectrum obtained from WT tryptic digests containing the thioglycine modified L461-R491 peptide ( $m/z$  3432 Da). A small amount of the unmodified L461-R491 peptide ( $m/z$  3416 Da) is also observed, which probably arises via non-enzymatic hydrolysis of the thioamide bond as previously reported (9). **Bottom,** Spectrum obtained from  $\Delta ycaO-tfuA$  tryptic digests containing only the unmodified L461-R491 peptide ( $m/z$  3416 Da). The  $m/z$  3375 Da species present in both samples corresponds to MCR $\alpha$  residues D392-R421.

**Figure 5**

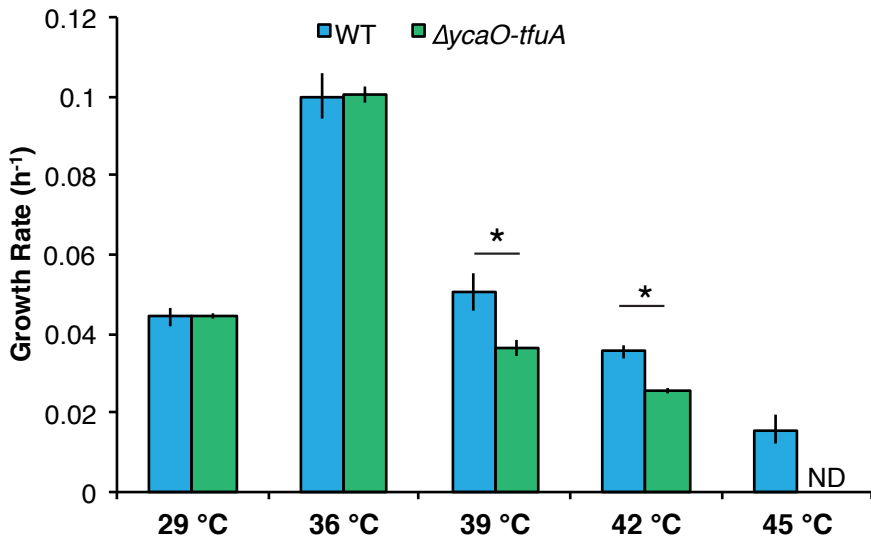

**Fig. 5:** Growth rate of the WWM60 (WT; blue) and the  $\Delta ycaO-tfuA$  mutant (green) in HS medium with 125 mM methanol at the indicated temperatures. A statistically significant difference ( $p < 0.01$ ) using a two-tailed unpaired t-test is indicated with an \*.

ND indicates that no growth was detected after one month of incubation.

Figure 2 - Supplementary Figure 1

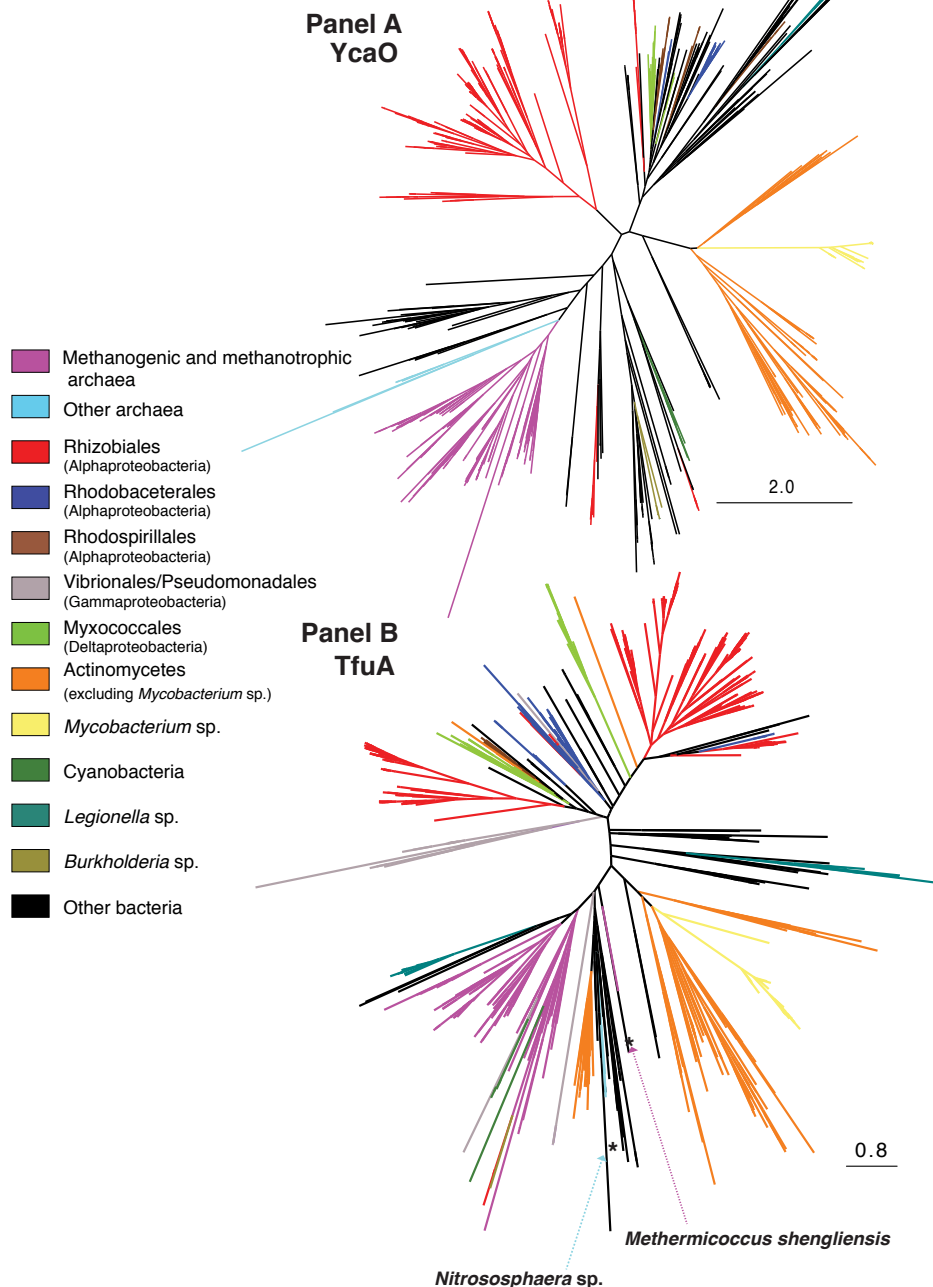

**Fig. 2 - Supp Fig. 1: Panel A**, Unrooted maximum-likelihood phylogeny of 1,000 YcaO sequences retrieved from the NCBI non-redundant protein sequence database using the corresponding sequence from *Methanosarcina acetivorans* as a search query. **Panel B**, Unrooted maximum-likelihood phylogeny of 1000 TfuA sequences retrieved from the NCBI non-redundant protein sequence database using the corresponding sequence from *M. acetivorans* as a search query. Divergent archaea-derived sequences on the TfuA tree are denoted with

## Figure 2 - Supplementary Figure 2

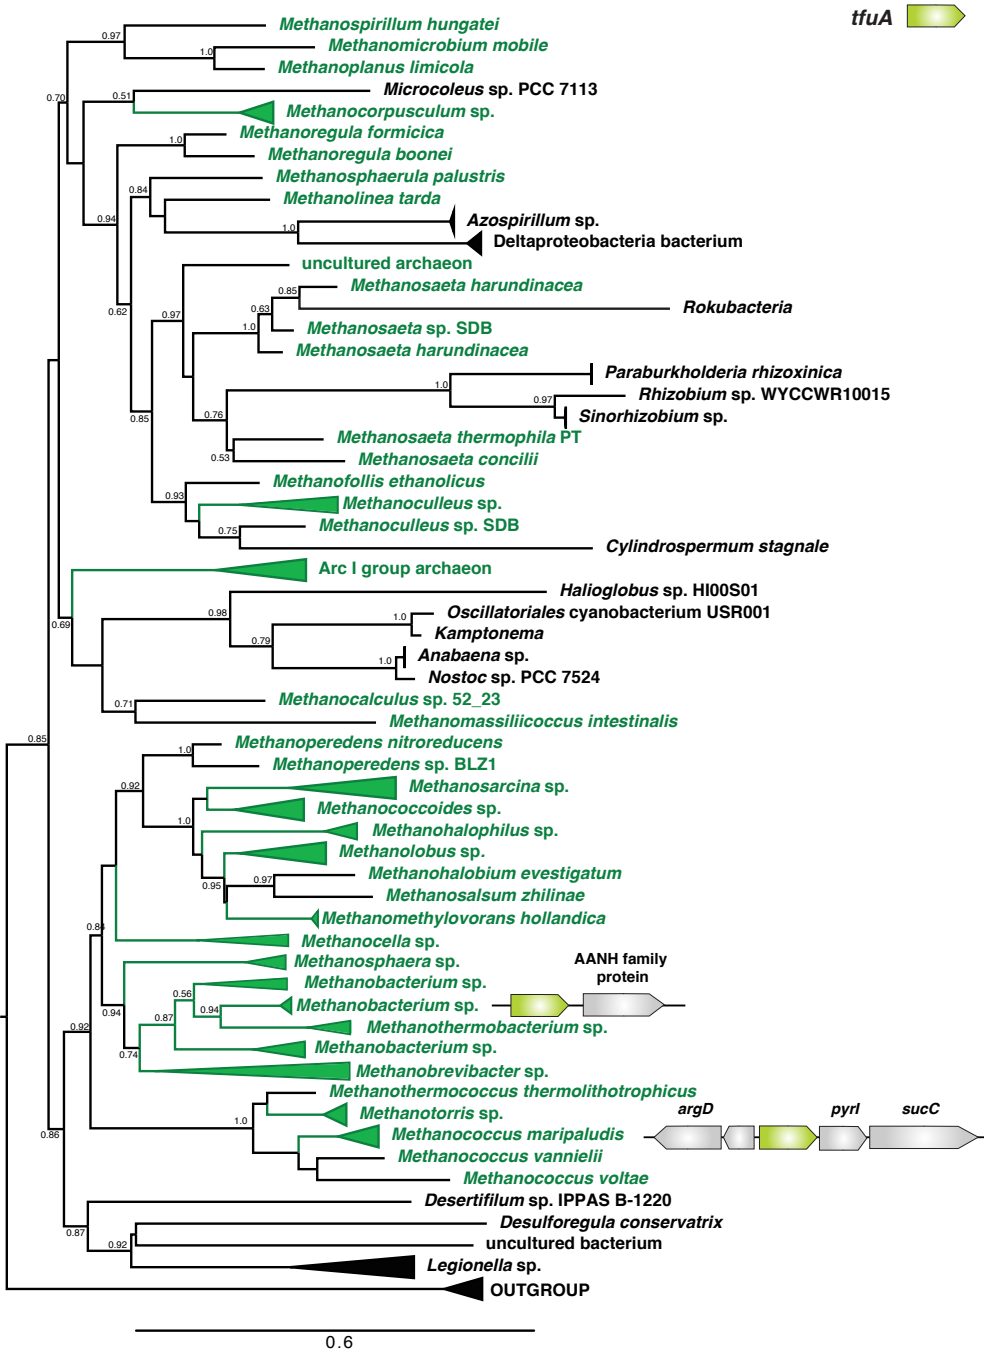

**Fig. 2 - Supp. Fig. 2:** Unrooted maximum-likelihood phylogeny of 1,000 TfuA sequences retrieved from the NCBI non-redundant protein sequence database using the corresponding sequence from *Methanosarcina acetivorans* as a search query. For taxa where *tfuA* and *ycaO* are not adjacently encoded genes a gene architecture diagram is shown. The node labels indicate support values calculated using the Shiomdaira-Hasegawa test using 1000 resamples. Support values less than 0.5 have not been shown. The outgroup is comprised of various bacterial TfuA protein sequences.

## Figure 3 - Supplementary Figure 1

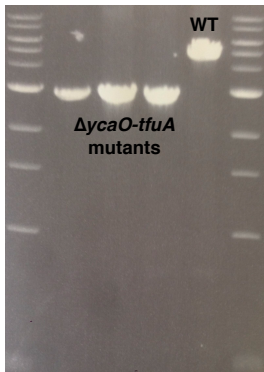

**Fig. 3 - Supp. Fig. 1:** A PCR-based screen to genotype the *ycaO-tfuA* locus in *Methanosarcina acetivorans*. The PCR amplicon from three independently derived mutants containing an unmarked in-frame deletion of *ycaO-tfuA* (Lanes 2-4) is 2980 bp whereas the corresponding amplicon from a strain containing the wild-type locus is 4742 bp (Lane 5). Lanes 1 and 6 contain a 1 kb DNA ladder.

# Figure 4 - Supplementary Figure 1

## Panel A

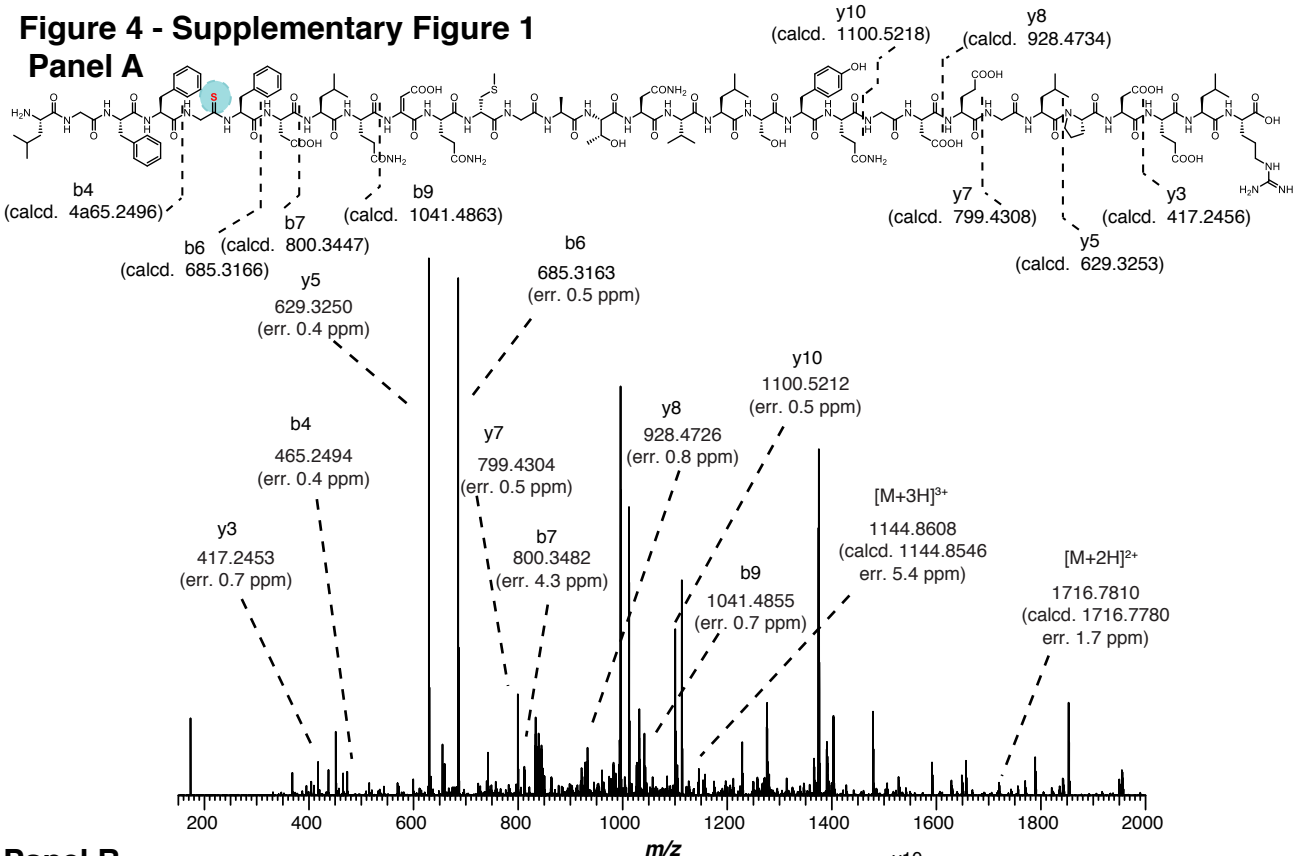

## Panel B

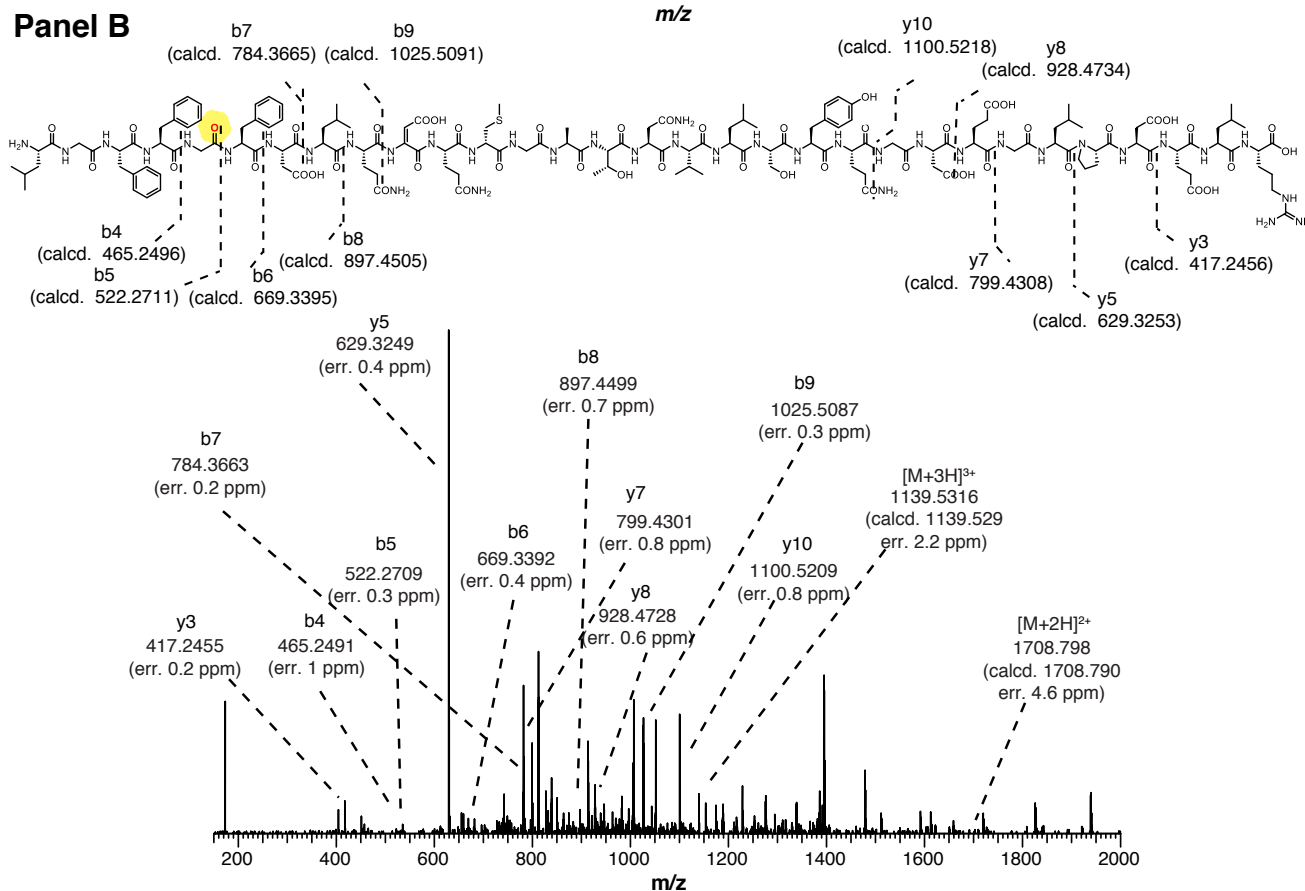

**Fig. 4 - Supp. Fig 1: Panel A**, High-resolutions electrospray ionization tandem mass spectrometry (HR-ESI MS/MS) analysis of a wild-type tryptic peptide from *Methanosarcina acetivorans* McrA (L461-R491, m/z 3432 Da). The b6 ion localizes the thioamide modification to Gly465. No b5 ion was detected suggesting negligible fragmentation at the thioamide bond. Predicted masses and associated errors are shown. **Panel B**, HR-ESI-MS/MS analysis of the corresponding McrA tryptic peptide from the  $\Delta ycaO$ - $tfuA$  deletion strain of *M. acetivorans* (m/z 3416 Da). The b5 and b6 ion localizes the amide functionality at Gly465. Predicted masses and associated errors are shown.



**Figure 4 - Supplementary Figure 2**

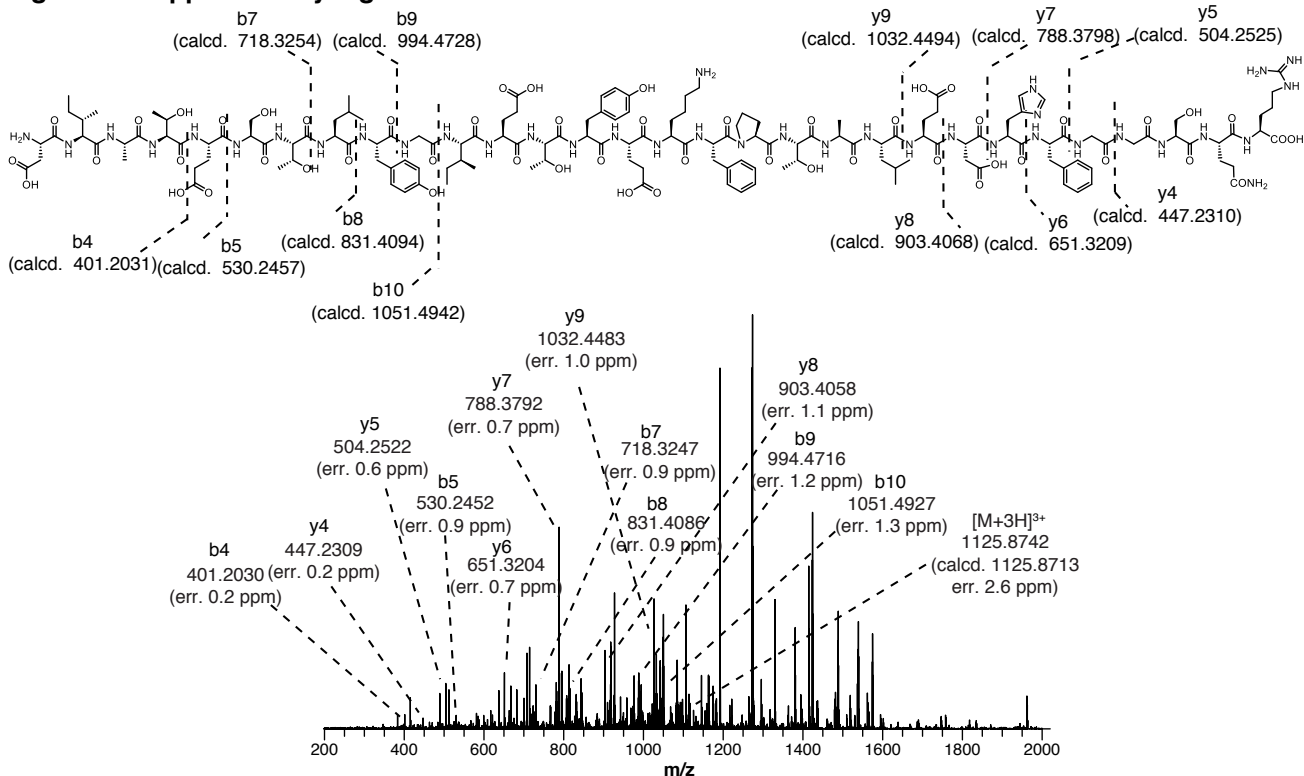

**Fig. 4 - Supp. Fig. 2:** HR-ESI-MS/MS of the tryptic peptide from *Methanosarcina acetivorans* McrA (D392-R421, m/z 3375 Da) present in both the wild-type and  $\Delta ycaO$ - $\Delta tfuA$  deletion strain. Predicted masses and associated errors are shown.

**Figure 4 - Supplementary Figure 3**

**Panel A**

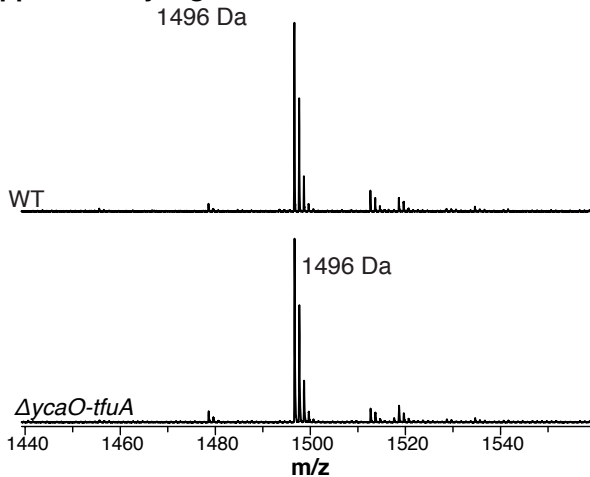

**Panel B**

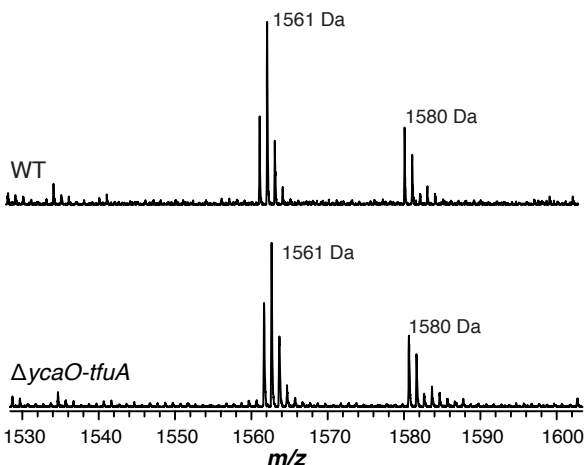

**Fig. 4 - Supp. Fig. 3: Panel A**, Matrix-assisted laser desorption/ionization time-of-flight mass spectrometry (MALDI-TOF MS) analysis of the wild-type (WT, top) and  $\Delta ycaO-tfuA$  deletion strain (bottom) spectra identify the McrA tryptic peptide, H271-R284 ( $m/z$  1496 Da), containing the known *N*-methylhistidine modification. This suggests that the thioglycine formation is not a prerequisite for this methylation event. **Panel B**, MALDI-TOF MS analysis of the WT (top) and  $\Delta ycaO-tfuA$  deletion strain (bottom) spectra identify the McrA tryptic peptide, F408-R421, ( $m/z$  1561 Da). This peptide has been reported to contain a  $\beta$ -methylation at Q420 in other methanogens (9), however, it remains unmodified in *M. acetivorans*.

Figure 5 - Supplementary Figure 1

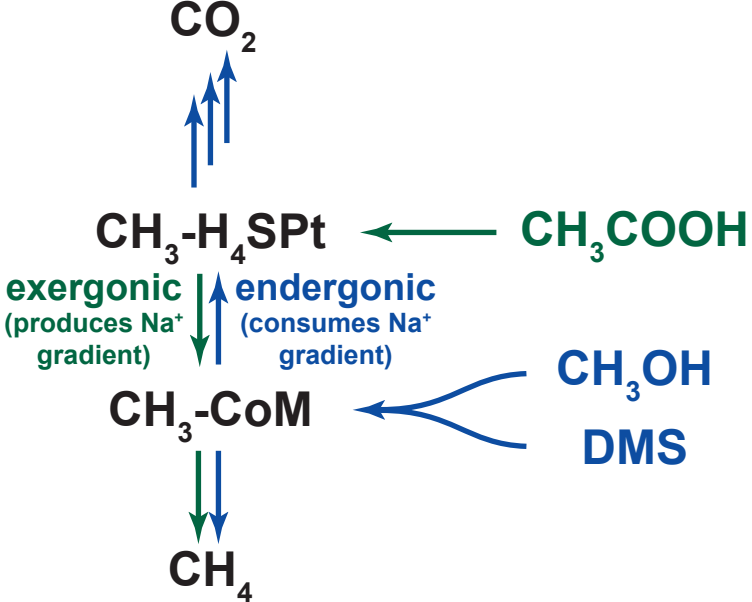

**Fig. 5 - Supp. Fig. 1:** An overview of methanogenic metabolism in *M. acetivorans*. Methylotrophic substrates such as methanol ( $\text{CH}_3\text{OH}$ ) or dimethylsulfide (DMS) enter the methanogenic pathway via methylation of coenzyme M (CoM) and subsequent disproportionation to methane ( $\text{CH}_4$ ) and carbon dioxide ( $\text{CO}_2$ ; metabolic flux is shown as blue arrows). Notably, the first step in oxidation of  $\text{CH}_3\text{-CoM}$  to  $\text{CO}_2$  is the energy-requiring transfer of the methyl moiety to generate methyl-tetrahydrosarcinapterin ( $\text{CH}_3\text{-H}_4\text{SPT}$ ). In contrast, acetic acid enters the pathway at the  $\text{CH}_3\text{-H}_4\text{SPT}$  level, followed by reduction to  $\text{CH}_4$  (green arrows). Thus, the second step of the pathway is exergonic.
